# Supplementary material for: Letermovir Prophylaxis for Cytomegalovirus Reactivation in Allo-HSCT A Retrospective Single Center real-world data
Source: Research Square preprint supplement (doi:10.21203/rs.3.rs-6517465/v1), 2025-06-02
Supplement: Supplementary file 1 [file f07e351de8b68059de133c96.docx]

**Table 1: Transplantation regimen of 159 patients**

| Conditioning | | Graft Source | | GVHD Prevention | |
| --- | --- | --- | --- | --- | --- |
| Relapsed or refractory ALL | Total Body Irradiation/Thiotepa/ Cyclophosphamide | **Aplastic anemia (donor and recipient blood type consistency)** | Bone marrow + peripheral blood stem cells | **Basic regimen (All enrolled participants)** | Cyclosporin A+ Mycophenolate mofetil+ short-term Methotrexate |
| Central nervous system leukemia, underlying heart disease, salvage transplantation. | Thiotepa/Busulfan /Fludarabine or Mitoxantrone Hydrochloride Liposome | **Aplastic anemia (donor and recipient blood type inconsistency), Severe myelodysplasia,**  **Highly malignant conditions** | Umbilical cord blood (the Shandong Umbilical Cord Blood Bank) +peripheral blood stem cells | **HLA haploidentical donor and identical unrelated donor HSCT** | Basic regimen+ Anti-Human Thymocyte immunoglobulin (10 mg/kg) during conditioning |
| Aplastic anemia | Fludarabine/Anti-Human Thymocyte immunoglobulin /Cyclophosphamide or Busulfan | **Others** | Peripheral blood stem cells | **HLA identical related donor and the donor was a female over 40 or had given birth** | Basic regimen+ Anti-Human Thymocyte immunoglobulin (5 mg/kg) during conditioning |
| Others | Modified Cytarabine/ Busulfan/Cyclophosphamide/  Semustine | **CD3+ cells count ≥4×108/kg from donor peripheral blood stem cells** | Basic regimen+ two doses of basiliximab on days +1 and +4 |
